# Supplementary material for: LIN28B affects gene expression at the hypothalamic-pituitary axis and serum testosterone levels
Source: PubMed Central journal article supplement (PMC6889388; doi:10.1038/s41598-019-54475-6), 2019-12-02
Supplement: 41598_2019_54475_MOESM1_ESM.pdf [file 41598_2019_54475_MOESM1_ESM.pdf]

1 **SUPPLEMENTARY FILE 1.**

2 ***LIN28B* affects gene expression at the hypothalamic-pituitary axis and serum testosterone levels**

3

4 Jaakko T Leinonen, Yu-Chia Chen, Jana Pennonen, Leevi Lehtonen, Nella Junna, Taru Tukiainen, Pertti

5 Panula and Elisabeth Widén

6

7 Supplementary data file 1.

8

9 A) 5' gatttcgctggaactttggaacggagggtccgcggggaaacATGGCCGAAG\*GAGGGCCGCGCAGAGGTGGCGGGT  
10 CGGACACCGCCAGGACTCCGCCGCAGAGTCTGTCTGGCTCGGGTTACTGCAAGTGGTTCAATGTCCGCATGGGGTTTGGA  
11 TTTATATCGATGACCAGCAGCGAGGGGAAGCCAGTGGACCCTCCGCTAGACGTGTTTCGTTACCAAAGTAAGCTGGTGAT  
12 GGAG\*GGCTTCAGGAGCCTGCGGGAGGGCGAGCAGGTGGAGTTCACCTTTAAGAGGTTCGAGTAAAGGTCTGGAGTCGCTC  
13 CGGGTGACGGGGCCCGGGGAGGCCCTGCTCTGGCAGCGAGCGACGCCCCAAAGCAAAGGCCCCGCCCTCAAACGCAA  
14 ACCAAAGGGAGACCGGTGTATAACTGTGGAGGTCTGGACCACCACGCTAAAGAGTGTGGCCTTCCACCCCAGCCAAAGAA  
15 GTGTCACTACTGTCAGAGTGTACGCACATGGTGGCCCAGTGTCCCCACAAGGGGGCGCCGTGCGCCCTCCGCGTCTCAGG  
16 ACCCGCAACGCCCTCCACCTCCGCTCAGTCCCCGGAAGAGGAAAGCCGCTCAGGCTCATCTTCATCCCCGGAGGAGGCT  
17 TCTCAAAGAGGGAGTTCGCTCCCAGCGCTGGAGAAAGAGCCGGGACTGAaacaacacacctctcatccagaccaggcccg  
18 gacacgaaatcatctacctcaaacag3'

19

20 B) 5' gatttcgctggaactttggaacggagggtccgcggggaa----GGTCGAAG\*GAGGGCCGCGCAGAGGTGGCGGGT  
21 CGGACACCGCCAGGACTCCGCCGCAGAGTCTGTCTGGCTCGGGTTACTGCAAGTGGTTCAATGTCCGCATGGGGTTTGGA  
22 TTTATATCGATGACCAGCAGCGAGGGGAAGCCAGTGGACCCTCCGCTAGACGTGTTTCGTTACCAAAGTAAGCTGGTGAT  
23 GGAG\*GGCTTCAGGAGCCTGCGGGAGGGCGAGCAGGTGGAGTTCACCTTTAAGAGGTTCGAGTAAAGGTCTGGAGTCGCTC  
24 CGGGTGACGGGGCCCGGGGAGGCCCTGCTCTGGCAGCGAGCGACGCCCCAAAGCAAAGGCCCCGCCCTCAAACGCAA  
25 ACCAAAGGGAGACCGGTGTATAACTGTGGAGGTCTGGACCACCACGCTAAAGAGTGTGGCCTTCCACCCCAGCCAAAGAA  
26 GTGTCACTACTGTCAGAGTGTACGCACATGGTGGCCCAGTGTCCCCACAAGGGGGCGCCGTGCGCCCTCCGCGTCTCAGG  
27 ACCCGCAACGCCCTCCACCTCCGCTCAGTCCCCGGAAGAGGAAAGCCGCTCAGGCTCATCTTCATCCCCGGAGGAGGCT  
28 TCTCAAAGAGGGAGTTCGCTCCCAGCGCTGGAGAAAGAGCCGGGACTGAaacaacacacctctcatccagaccaggcccg  
29 gacacgaaatcatctacctcaaacag3'

30

31 C) 5' gatttcgctggaactttggaacggagggtccgcggggaaacATGGCCGAAG\*GAGGGCCGCGCAGAGGTGGCGGGT  
32 CGGACACCGCCAGGACTCCGCCGCAGAGTCTGTCTGGCTCGGGTTACTGCAAGTGGTTCAATGTCCGCATGGGGTTTGGA  
33 TTTATATCGATGACCAGCAGCGAGGGGAAGCCAGTGGACCCTCCGCTAGACGTGTTTCGTTACCAAAGTAAGCTGGTGAT  
34 GGAG\*GGCTTCAGGAG-----GGCGAGCAGGTGGAGTTCACCTTTAAGAGGTTCGAGTAAAGGTCTGGAGTCGCTC  
35 CGGGTGCAGGGGGCCCGGGGAGGCCCTGCTCTGGCAGCGAGCGACGCCCCAAAGCAAAGGCCCCGCCCTCAAACGCAA  
36 ACCAAAGGGAGACCGGTGTATAACTGTGGAGGTCTGGACCACCACGCTAAAGAGTGTGGCCTTCCACCCCAGCCAAAGAA

37 GTGTCACTACTGTCAGAGTGTACGCACATGGTGGCCCAGTGTCCCCACAAGGGGGCGCCGTCGCCCTCCGCGTCTCAGG  
38 ACCCGCAACGCCCTCCACCTCCGCTCAGTCCCCGGAAGAGGAAAGCCGCTCAGGCTCATCTTCATCCCCGGAGGAGGCT  
39 TCTCAAAGAGGGAGTCGCTCCCAGCGCTGGAGAAAGAGCCGGGACTGAaacaacacacacctctcatccagaccaggcccg  
40 gacacgaaatcatctacctcaaacag3'

41

42 D) 5' gatttcgctggaactttggaacggagggtccgcggggaacATGGCCGAAG\*GAGGGCCGCGCAGAGGTGGCGGGT  
43 CGGACACCGCCAGGACTCCGCCGAGAGTCTGTCTGGCTCGGGTTACTGCAAGTGGTTCAATGTCCGCATGGGGTTTGGGA  
44 TTTATATCGATGACCAGCAGCGAGGGGAAGCCAGTGGACCCTCCGCTAGACGTGTTTCGTTACCAAAGTAAGCTGGTGAT  
45 GGAG\*GGCTTCAGGAGCCT**TCAGGAGCCTTCAG**GAGGGCGAGCAGGTGGAGTTCACCTT**TAA**GAGGTTCGAGTAAAGGTCT  
46 GGAGTCGCTCCGGGTGACGGGGCCCGGGGAGGCCCTGCTCTGGCAGCGAGCGACCCCCAAAGCAAAGGCCCGCCCC  
47 TCAAACGCAAACCAAAGGGAGACCGGTGTATAACTGTGGAGGTCTGGACCACCACGCTAAAGAGTGTGGCCTTCCACCCC  
48 AGCCAAAGAAGTGTCACTACTGTCAGAGTGTACGCACATGGTGGCCCAGTGTCCCCACAAGGGGGCGCCGTCGCCCTCC  
49 GCGTCTCAGGACCCGCAACGCCCTCCACCTCCGCTCAGTCCCCGGAAGAGGAAAGCCGCTCAGGCTCATCTTCATCCCC  
50 GGAGGAGGCTTCTCAAAGAGGGAGTCGCTCCCAGCGCTGGAGAAAGAGCCGGGACTGAaacaacacacacctctcatccag  
51 accaggcccggacacgaaatcatctacctcaaacag3'

52

53 **Supplementary data 1. Annotated zebrafish *lin28b* cDNA sequences showing the locations of CRISPR-Cas9**  
54 **induced mutations.**

55 A) Wild-type *lin28b* cDNA sequence. Primer locations shown in green, 5' and 3' UTR shown in lower case  
56 letters and exons in uppercase. \* denotes exon boundary.

57 B) cDNA sequence for exon1 mutant fish, showing the deletion of four bases overlapping the translation  
58 initiation codon (ATG) and one mismatch (C>T). The only other potential initiation codon encoding for *lin28b*  
59 related transcript bolded and highlighted on red. The truncated protein potentially produced using this site  
60 would not contain the cold-shock and zinc-finger domains crucial for *lin28b* function.

61 C) cDNA sequence of exon3 mutant fish A, showing the deletion of 10 bases in *lin28b* exon 3. Premature  
62 stop codon bolded and highlighted in red.

63 D) cDNA sequence of exon3 mutant fish B, showing the insertion of 10 bases (red) + 3 mismatches (orange)  
64 compared to the wild-type sequence. Premature stop codon bolded and highlighted in red.

65

66

67

68

69

70

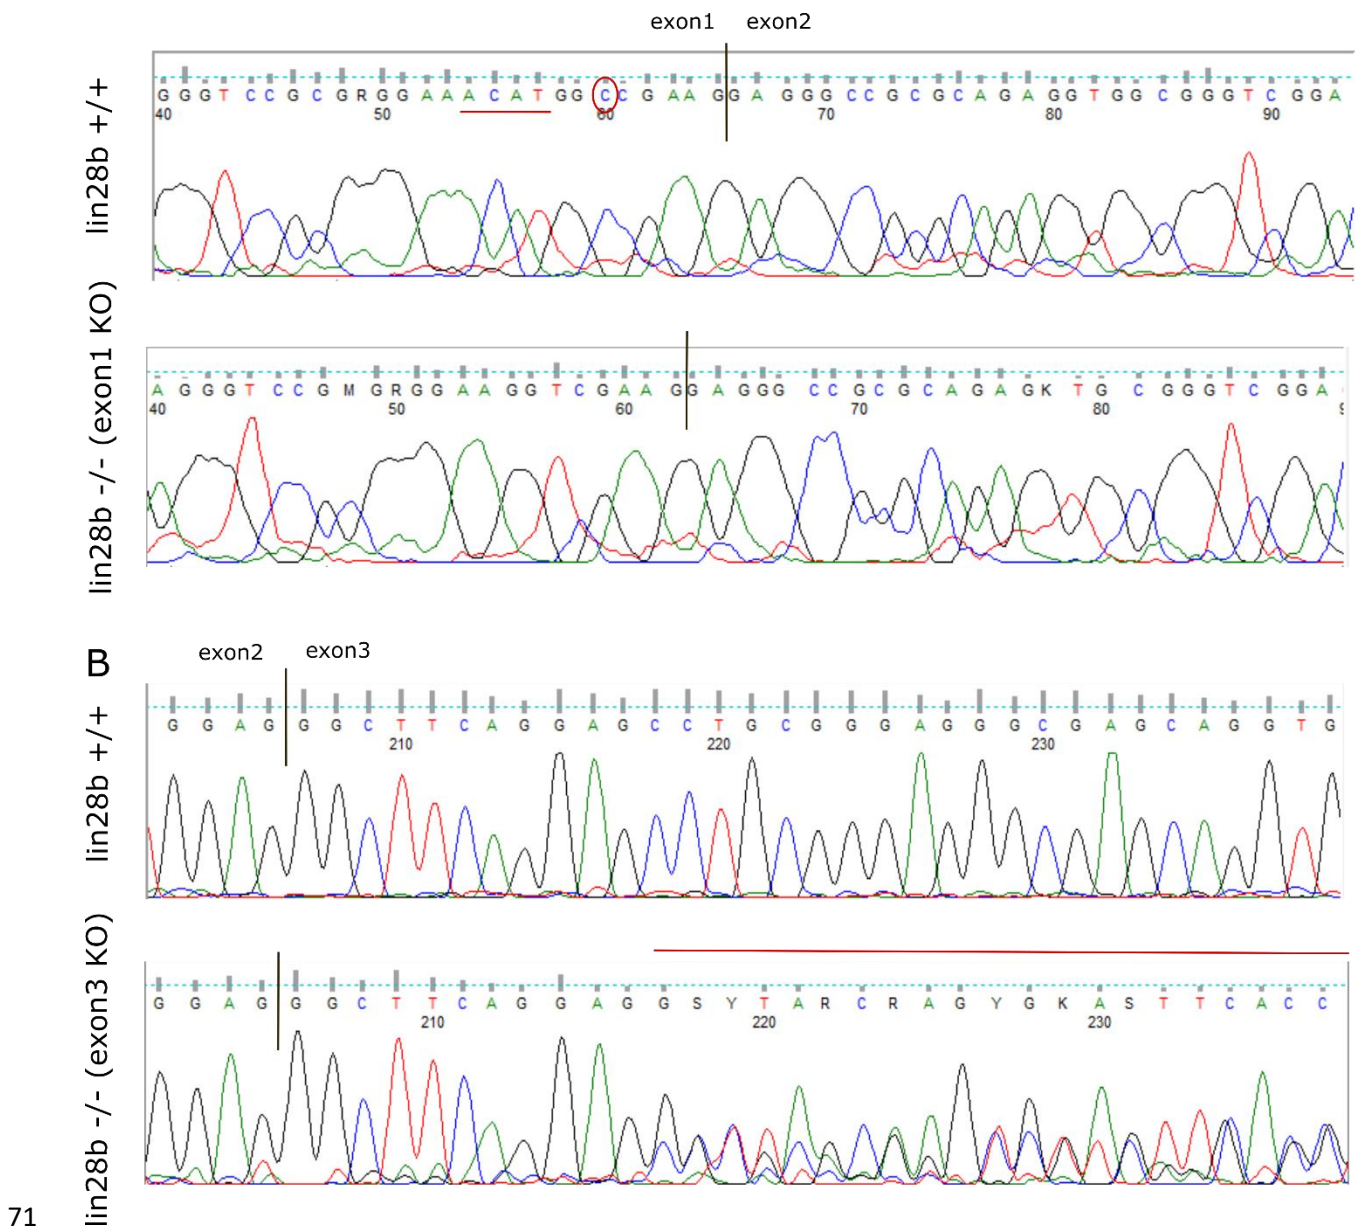

71

72

73 **Supplementary figure 1. cDNA traces from *lin28b* control and KO fish.**

74 A) Sequencing traces indicating the mutation location in exon1 mutant fish. Mutated based indicated with

75 red lines and circle. Exon boundaries marked with black lines. The KO fish were homozygous for a exon1

76 mutation that deleted four base pairs and introduced one mismatch. B) Sequencing traces indicating the

77 mutation location in exon3 mutant fish. Exon3 KO fish were compound heterozygous for exon3 mutations

78 that either deleted 10 base pairs, or inserted 10 base pairs and 3 mismatches to the canonical *lin28b* cDNA

79 sequence.

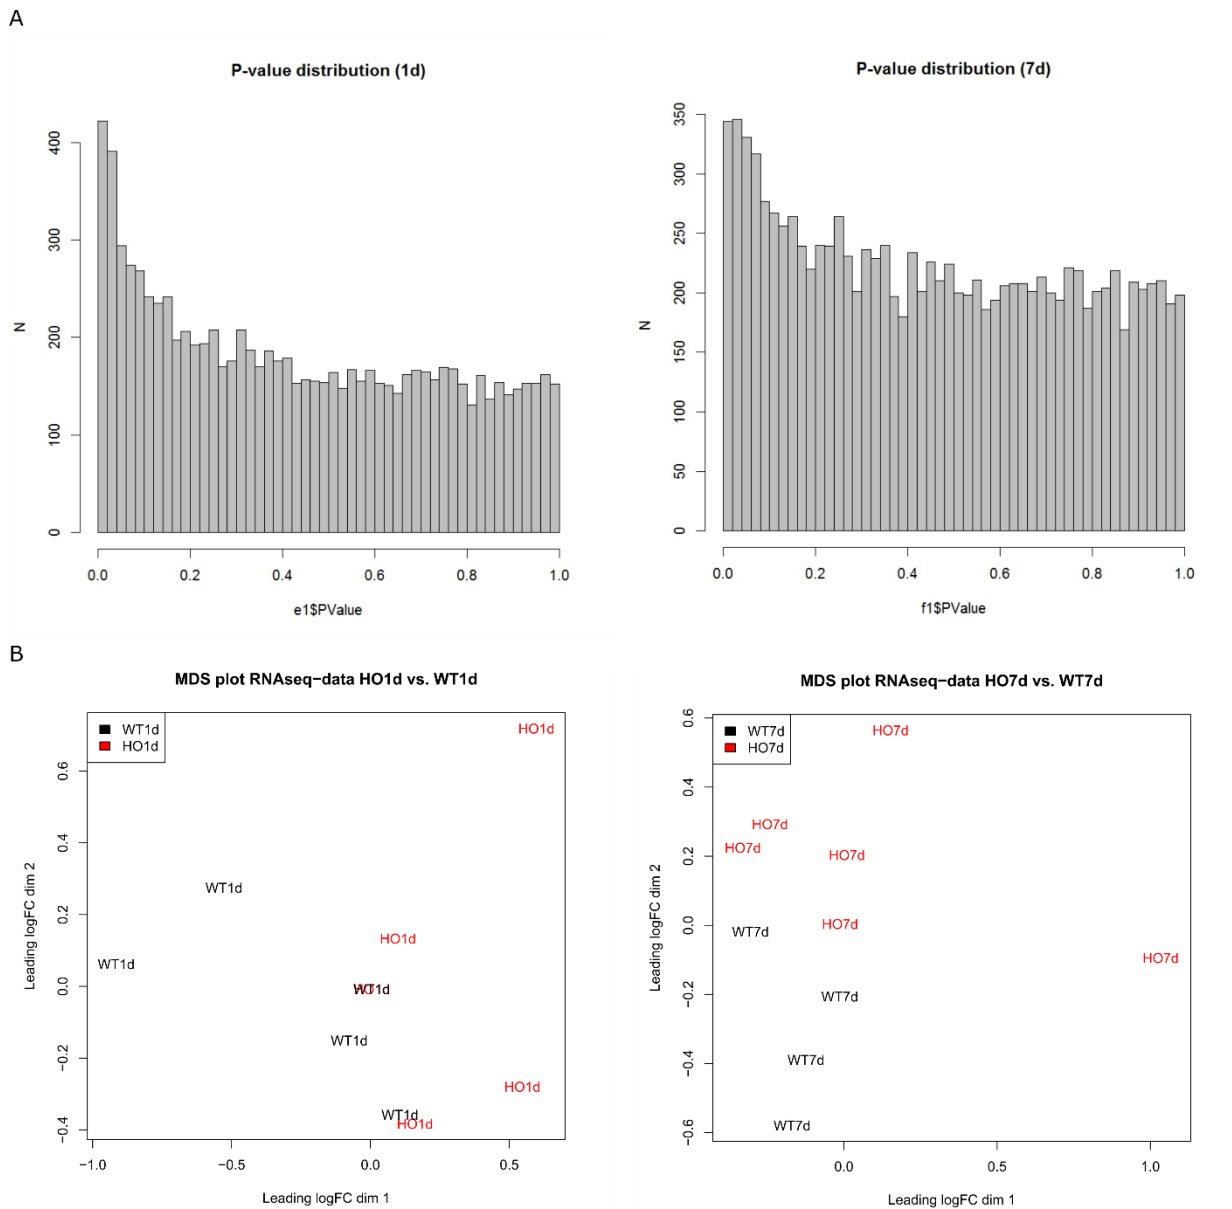

80

81 **Supplementary figure 2. P-value distribution and MDS-plots from the RNA-seq experiment.**

82 A) P-value distribution for 1d and 7d RNA-seq results, showing an excess of small p-values at both  
 83 time points. The result suggest that more genes show differential expression (reflected by  
 84 enrichment of small p-values) between the control and *lin28b* KO samples than expected by  
 85 chance. X-axis shows the p-value divided into bins by 0.02 unit intervals, and Y-axis shows the  
 86 number of genes in each bin. B) MDS-plots showing the clustering of the RNA-seq samples. At both  
 87 time points (1d and 7d) the control (WT) and KO (HO) samples cluster separately, reflecting  
 88 systematic differences in the gene expression between the groups.

89 **Supplementary table 1. Analysis of differential expression of steroidogenic enzymes in 7dpf fish, based**  
 90 **on RNA-seq data.** None of the studied genes showed statistically significant differences between the +/+  
 91 and -/- groups. FC=Fold change, CPM=counts per million, FDR= False Discovery Rate.

| Gene     | logFC    | logCPM   | F        | PValue   | FDR      |
|----------|----------|----------|----------|----------|----------|
| cyp11a1  | 2,15687  | -1,0649  | 1,677746 | 0,195226 | 1        |
| cyp11a2  | 0,014843 | -0,86194 | 6,39E-05 | 0,993624 | 1        |
| cyp11c1  | -0,04601 | 0,666241 | 0,006203 | 0,937225 | 1        |
| cyp17a1  | 0,14942  | 0,578306 | 0,067782 | 0,796632 | 0,954844 |
| cyp17a2  | 1,657376 | -1,25395 | 0,798593 | 0,371516 | 1        |
| cyp19a1a | 0,777384 | -0,79322 | 0,36603  | 0,545177 | 1        |
| cyp19a1b | 0,569599 | 0,273617 | 0,696764 | 0,403875 | 1        |

92

93 **Supplementary table 2. Characteristics of fish size included in the 130d qPCR experiment assessing HP**  
 94 **axis gene expression in sexually mature zebrafish**

95

| Genotype | Length(mm) | Weight(mg) |
|----------|------------|------------|
| KO       | 21,5       | 130        |
| KO       | 21,5       | 140        |
| KO       | 23         | 150        |
| KO       | 24         | 170        |
| KO       | 25         | 170        |
| Control  | 22,5       | 140        |
| Control  | 23         | 130        |
| Control  | 23         | 170        |
| Control  | 24         | 160        |
| Control  | 25         | 180        |

96

97

98

99 **Supplementary table 3. Primers and protocols used in the generation of *lin28b* KO zebrafish**

100

|                    | <b>PCR primers for mutation sequencing</b>                      | <b>PCR cycling conditions for sequencing</b>                 |
|--------------------|-----------------------------------------------------------------|--------------------------------------------------------------|
| <b>exon1</b>       | F: 5'-TACAAACAACGTAAACAAAG-3'; R:5'-AAAGAGACATGACTAAATATC-3'    | 95°C 3min; 35x(95°C 30s, 55°C 30s, 72°C 1min);<br>72°C 10min |
| <b>exon3</b>       | F: 5'-GACTCCAGACCTTTACTC-3'; R: 5'-TATACAAGAACGCCTGAT-3'        | 95°C 3min; 35x(95°C 30s, 55°C 30s, 72°C 1min);<br>72°C 10min |
|                    | <b>HRM primers for mutation detection</b>                       | <b>HRM cycling conditions</b>                                |
| <b>exon1</b>       | NA                                                              | NA                                                           |
| <b>exon3</b>       | F: 5'-CCTCTTAAAGGTGAACTCCA-3'; R:5'-GGGTGTAATAAATATACAAGAACG-3' | 95°C 5min; 40x(95°C 30s, 55°C 30s, 72°C 30s);<br>72°C 10min  |
|                    | <b>Primers for <i>lin28b</i> amplification from cDNA</b>        | <b>PCR cycling conditions for cDNA sequencing</b>            |
|                    | F:5'-GATTCGCTGGAACCTTG-3';<br>R:5'CTGTTTGAGGTAGATGATTTC-3'      | 95°C 3min; 35x(95°C 20s, 55°C 20s, 72°C 30s);<br>72°C 10min  |
|                    | <b>guideRNA Target Sequence</b>                                 |                                                              |
| <b>exon1</b>       | 5'-GGAGGGTCCGCGGGGAAACA-3'                                      |                                                              |
| <b>exon3</b>       | 5'-GGCTTCAGGAGCCTGCGGGA-3'                                      |                                                              |
|                    | <b>CRISPR-Cas9 Injection mixture <i>lin28b</i> exon1</b>        | <b>CRISPR-Cas9 Injection mixture <i>lin28b</i> exon3</b>     |
| <b>sgRNA exon1</b> | 0.5µl (195ng/µl)                                                | 0                                                            |
| <b>sgRNA exon3</b> | 0                                                               | 0.5µl (98ng/µl)                                              |
| <b>Cas9 mRNA</b>   | 2µl (592ng/µl)                                                  | 2µl (592ng/µl)                                               |
| <b>phenol red</b>  | 0.7µl                                                           | 0.7µl                                                        |
| <b>H2O</b>         | 0.5µl                                                           | 0.5µl                                                        |
| <b>total</b>       | 3.7µl                                                           | 3.7µl                                                        |

101
